# Supplementary material for: Multilamellar hyaluronic acid-b-poly(lactic acid) polymersomes for pathology-responsive MRI enhancement
Source: Royal Society of Chemistry journal article supplement (doi:10.1039/d4bm01583e), 2025-01-01
Supplement: d4bm01583e1.pdf [file d4bm01583e1.pdf]

## Multilamellar Hyaluronic Acid-B-Poly(Lactic Acid) Polymersomes For Pathology-Responsive MRI Enhancement

Dorian Foster<sup>\*a</sup>, Naisha Shah<sup>b</sup>, Alaura Cakley<sup>a</sup>, Ronald Beyers<sup>c</sup>, and Jessica Larsen<sup>a,d</sup>

### Supplemental Figures

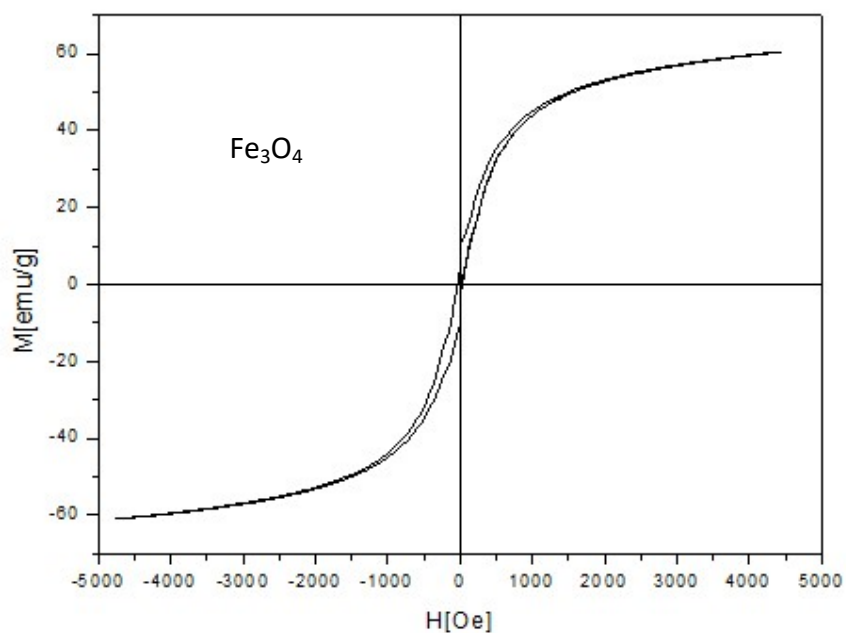

**Figure S1: M-H plot for Amine functionalized USPIOs.** Provided by the supplier (US Research Nanomaterials) and measured at room temperature

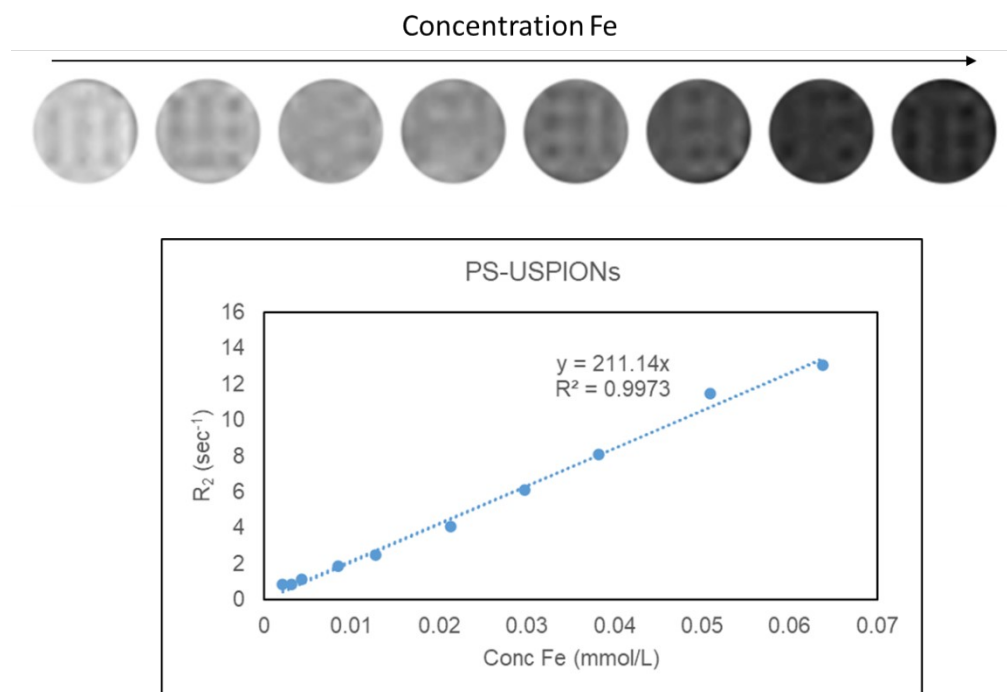

**Figure S2: Relaxivity plot for PS-USPIONS.** Plot of  $R_2$  (or  $1/T_2$ ) versus concentration of iron and corresponding linear fit, where slope is equal to  $r_2$ .  $R_2$  was calculated through a Matlab program set up for automatic calculations on given regions of interest. The images used for calculation were taken at Auburn University on a 3.0 T MRI scanner.

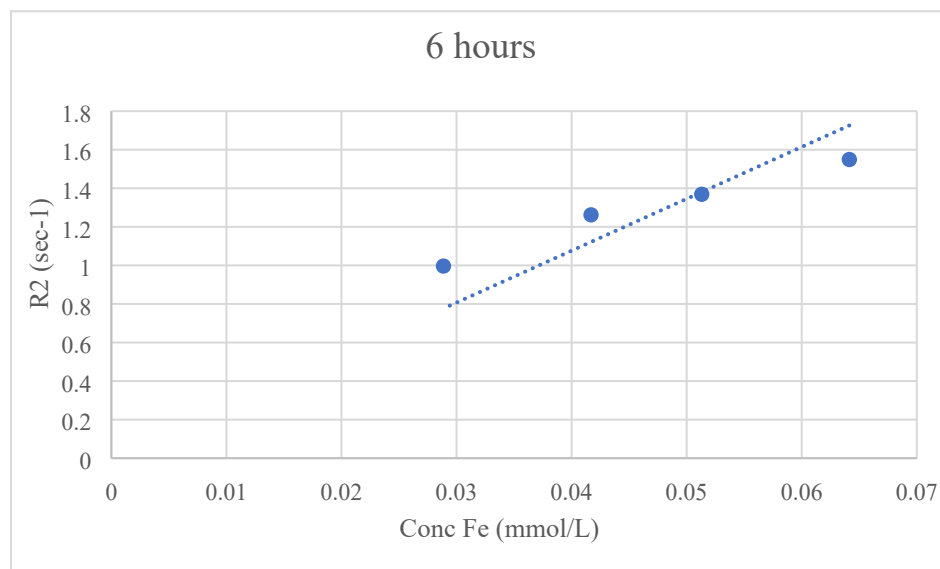

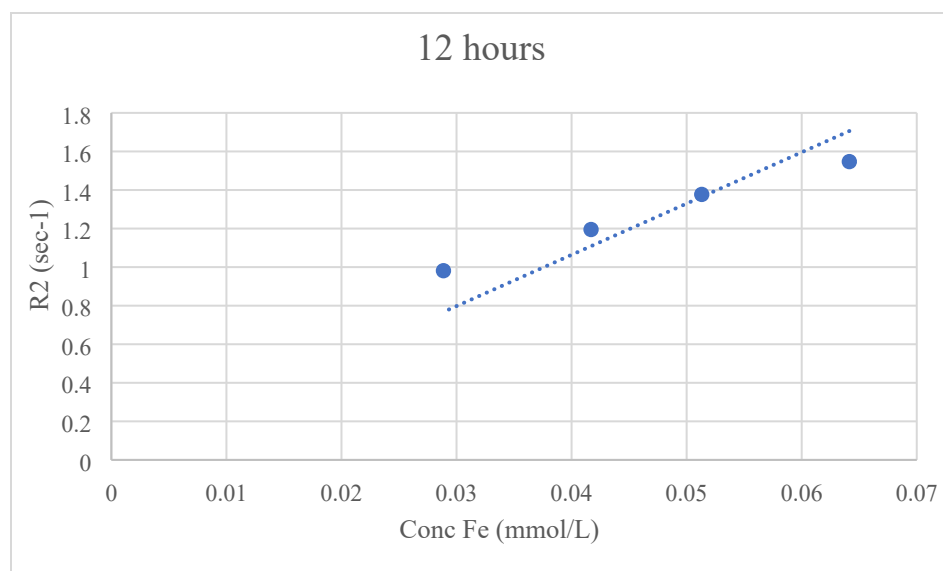

**Figure S3: Relaxivity plot for PS-USPIONs after Pathologic Buffer Incubation over Time .** Plot of  $R_2$  (or  $1/T_2$ ) versus concentration of iron and corresponding linear fit, where slope is equal to  $r_2$ .  $R_2$  was calculated through a Matlab program set up for automatic calculations on given regions of interest. The images used for calculation were taken at Auburn University on a 3.0 T MRI scanner. Each timepoint was used to calculate relaxivity with a linear plot going through (0,0).

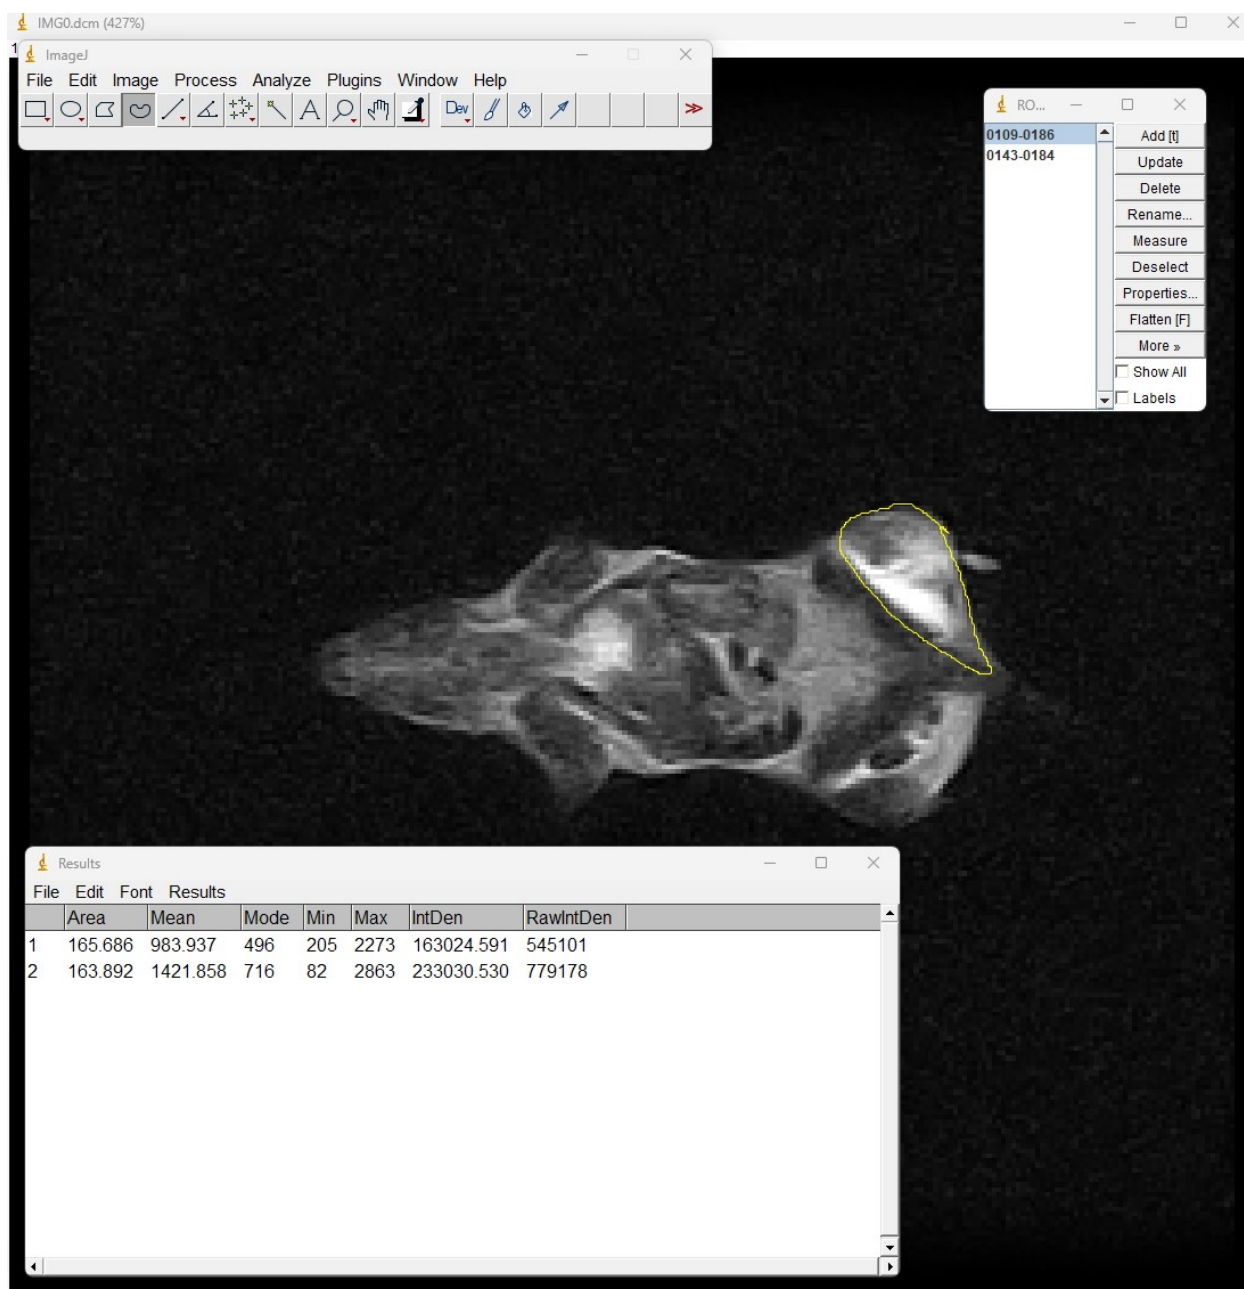

**Figure S4: ImageJ Analysis of Integrated Density.** Regions of interest (ROIs) were drawn around each leg muscle. Area, Mean Gray Intensity, Mode Gray Intensity, and Max Gray Intensity were calculated, along with the Integrated Density. To calculate the integrated density as reported in Figure 7B, measurements from Image J were divided by the ROI area. Fold Normal Integrated Density was calculated by comparing the normalized integrated density of the PBS-injected leg to the PS-USPION injected leg in each animal.
